# Supplementary material for: Biophysical differences in IgG1 Fc-based therapeutics relate to their cellular handling, interaction with FcRn and plasma half-life
Source: PubMed Central journal article supplement (PMC9388496; doi:10.1038/s42003-022-03787-x), 2022-08-18
Supplement: 42003_2022_3787_MOESM2_ESM.pdf [file 42003_2022_3787_MOESM2_ESM.pdf]

## Description of Additional Supplementary Files

**File name:** Supplementary Data

**Description:** Raw data underlying data shown in main figures.
